1 **Impact of monoclonal antibody treatment on hospitalization and mortality among non-**  
2 **hospitalized adults with SARS-CoV-2 infection**

3

4 **Authors:** J. Ryan Bariola MD<sup>1</sup>, Erin K. McCreary PharmD<sup>1</sup>, Richard J. Wadas MD<sup>2</sup>, Kevin E.  
5 Kip PhD<sup>3</sup>, Oscar C. Marroquin MD<sup>3</sup>, Tami Minnier MSN, RN<sup>4</sup>, Stephen Koscumb BS<sup>3</sup>, Kevin  
6 Collins BS<sup>3</sup>, Mark Schmidhofer MD<sup>5</sup>, Judith A. Shovel BSN RN<sup>4</sup>, Mary Kay Wisniewski, MT  
7 MA COM<sup>4</sup>, Colleen Sullivan MHA<sup>6</sup>, Donald M. Yealy MD<sup>2</sup>, David A Nace MD MPH<sup>7</sup>, David  
8 T. Huang MD MPH<sup>2,8,9</sup>, Ghady Haidar MD<sup>1</sup>, Tina Khadem PharmD<sup>1</sup>, Kelsey Linstrum MS<sup>6,9</sup>,  
9 Christopher W. Seymour MD MSc<sup>6,9</sup>, Stephanie K. Montgomery MS<sup>6,9</sup>, Derek C. Angus MD  
10 MPH FRCP<sup>6,8,9</sup>, Graham M. Snyder MD SM<sup>1</sup>

11 1. Division of Infectious Diseases, Department of Medicine, University of Pittsburgh School of  
12 Medicine, Pittsburgh, PA, USA

13 2. Department of Emergency Medicine, University of Pittsburgh School of Medicine,  
14 Pittsburgh, PA, USA

15 3. Clinical Analytics, University of Pittsburgh Medical Center, Pittsburgh, PA, USA

16 4. Wolff Center, University of Pittsburgh Medical Center, Pittsburgh, PA, USA

17 5. Division of Cardiology, Dept of Medicine, University of Pittsburgh School of Medicine,  
18 Pittsburgh, PA, USA

19 6. UPMC Health System Office of Healthcare Innovation, Pittsburgh, PA, USA

20 7. Division of Geriatric Medicine, Department of Medicine, University of Pittsburgh,  
21 Pittsburgh, PA, USA

22 8. Department of Critical Care Medicine, University of Pittsburgh School of Medicine,  
23 Pittsburgh, PA, USA

24 9. Clinical Research Investigation and Systems Modeling of Acute Illness (CRISMA) Center,  
25 Department of Critical Care Medicine, University of Pittsburgh School of Medicine,  
26 Pittsburgh, PA, USA

27

28 **Corresponding Author:**

29 Graham M. Snyder, MD SM

30 Address: 3601 Fifth Avenue, Suite 150, Pittsburgh, PA 15213

31 Phone/Fax: 412-647-6718/412-692-2768

32 Email: [snydergm3@upmc.edu](mailto:snydergm3@upmc.edu)

33 **Keywords:** COVID-19, SARS-CoV-2, monoclonal antibodies, bamlanivimab, etesevimab,  
34 casirivimab, imdevimab

35

36 **ABSTRACT**

37 **Background:** Monoclonal antibody (mAb) treatment may prevent complications of COVID-19.

38 We sought to quantify the impact of bamlanivimab monotherapy on hospitalizations and  
39 mortality, as well as Emergency Department (ED) visits without hospitalization, among  
40 outpatients at high risk of COVID-19 complications.

41 **Methods:** We compared patients receiving mAb to patients who met criteria but did not receive  
42 mAb from December 2020 through March 2021. The study population selection used propensity  
43 scores to match 1:1 by likelihood to receive mAb. The primary outcome was hospitalization or  
44 all-cause mortality within 28 days; the secondary outcome was hospitalization or ED visit  
45 without hospitalization within 28 days. Odds ratios (OR) calculation used logistic regression  
46 modeling including propensity score and mAb receipt predictors.

47 **Results:** The study population included 234 patients receiving mAb and 234 matched  
48 comparator patients not receiving mAb. Patients receiving mAb were less likely to experience  
49 hospitalization or mortality (OR 0.31, 95% confidence interval [95%CI] 0.17-0.56,  $p=0.00001$ )  
50 and hospitalization or ED visit without hospitalization (OR 0.50, 95%CI 0.43-0.83,  $p=0.007$ ).  
51 The impact of mAb was more pronounced in prevention of hospitalization (among all age  
52 groups, OR 0.35, 95%CI 0.19-0.66,  $p=0.001$ ) than mortality or ED visit without hospitalization,  
53 and most strongly associated with patients age 65 years and older (primary outcome OR 0.28,  
54 95%CI 0.14-0.56,  $p=0.0003$ ).

55 **Conclusions:** Bamlanivimab monotherapy was associated with reduction in the composite  
56 outcome of hospitalizations and mortality in patients with mild-moderate COVID-19. The  
57 benefit may be strongest in preventing hospitalization in patients ages 65 years or older.

## 58 INTRODUCTION

59 Monoclonal antibodies (mAbs) bind to the SARS-CoV-2 spike (S) protein and block viral  
60 entry into host cells, neutralizing the virus.<sup>1-5</sup> Between November 2020 and February 2021 four  
61 mAbs provided as three treatments received Food and Drug Administration Emergency Use  
62 Authorization (EUA) for treatment of patients with mild to moderate COVID-19 within 10 days  
63 of symptom onset: bamlanivimab 700mg (LY-coV555; Eli Lilly), etesevimab 1,400mg (LY-  
64 CoV016; Eli Lilly), casirivimab 1,200mg (REGN10933; Regeneron), imdevimab 1,200mg  
65 (REGN10987). Several clinical trials currently evaluate mAbs for prevention or treatment of  
66 COVID-19; however, real-world data are limited, and the role of mAbs for patients with  
67 COVID-19 remains controversial.<sup>3, 5</sup>

68 Use of mAb therapy is low in the United States despite widespread drug availability due  
69 to lack of robust efficacy data, operational challenges with outpatient infusions, and patient  
70 access issues.<sup>6</sup> Our health system established a mAb program in November 2020 to decrease  
71 COVID-19-related complications for patients with mild-moderate illness and expand access to  
72 care for underserved patients with COVID-19. Initially, only bamlanivimab monotherapy was  
73 available; our evaluation and distribution process has been described elsewhere.<sup>7</sup> This study  
74 quantifies the impact of bamlanivimab monotherapy on hospitalizations, mortality, and  
75 Emergency Department (ED) visits among outpatients at high risk of progressing to severe  
76 COVID-19. We also explored whether patient age, body mass index, and timing of infusions  
77 relative to initial diagnosis had any association with response to therapy.

78

## 79 METHODS

### 80 Study Setting

81 UPMC is a 40-hospital integrated academic healthcare system providing care principally  
82 within central and western Pennsylvania (USA). After the November 2020 EUA was granted for  
83 bamlanivimab, UPMC rapidly established 16 outpatient infusion centers across all served  
84 geographical areas. We also infused mAb at our UPMC Senior Communities (i.e., long-term care  
85 facilities), patient homes (via collaboration with a home infusion company), and behavioral  
86 health units. Physicians referred patients via outpatient and oncology electronic medical records  
87 (EMR) or paper order including non-UPMC providers. A centralized team with pharmacists and  
88 physicians reviewed orders daily to confirm EUA criteria; decentralized nursing teams then  
89 contacted and scheduled eligible patients for infusions. This study was approved by the UPMC  
90 Quality Improvement Review Committee (Project ID 2882 and Project ID 3116).

91 We used the EMR to access all key clinical data, including detailed sociodemographic  
92 and medical history data, diagnostic and clinical tests conducted, surgical and other treatment  
93 procedures performed, prescriptions ordered, and billing charges on all outpatient and in-hospital  
94 encounters, with diagnoses and procedures coded based on the International Classification of  
95 Diseases, Ninth and Tenth revisions (ICD-9 and ICD-10, respectively).

96 We linked the deidentified primary data sources using common variables within the  
97 UPMC data systems aggregated in its Clinical Data Warehouse that include: (i) *Medipac*, the  
98 admit, discharge and transfer registration and hospital-based billing system; (ii) *Cerner*, the  
99 inpatient EMR for relevant clinical information for bedded patients at a UPMC inpatient  
100 hospital; (iii) *Epic*, the UPMC EMR for ambulatory office visits owned by UPMC; and (iv) *Aria*,  
101 the EMR utilized in most ambulatory Cancer Centers at UPMC for both radiation oncology and  
102 medical oncology.<sup>8</sup>

### 103 **Study Population**

104 The study population was derived from patients who received bamlanivimab from  
105 December 9, 2020 to March 3, 2021. Patients were candidates for therapy based on criteria  
106 consistent with EUA criteria including: recently diagnosed mild to moderate COVID-19 (with a  
107 positive polymerase chain reaction or antigen test for SARS-CoV-2 virus within 10 days of the  
108 date the test was obtained); body mass at least 40 kg; age  $\geq 65$  years or age  $\geq 12$  years with a  
109 medical condition conferring high risk of COVID-19 progression to severe disease and/or  
110 hospitalization.<sup>9</sup> Patients were included in the study population if they completed the mAb  
111 infusion and had attainment of one of the study outcomes of interest within 28 days of infusion,  
112 or had 28 days of follow-up without an outcome.

113 We also derived a comparator group from the same at-risk population by identifying non-  
114 hospitalized patients with a positive polymerase chain reaction or antigen test for SARS-CoV-2  
115 during the same time period who were eligible for mAb infusion based on our modified EUA  
116 criteria but not infused. Similar to the group receiving mAb, comparator patients were included  
117 in the study population if they had attainment of one of the study outcomes of interest within 28  
118 days or had 28 days of follow-up without an outcome. For infused patients, the 28-day follow-up  
119 period commenced on the date of their infusion. For comparator patients, the follow-up period  
120 commenced two days after their SARS-CoV-2 test result date, which corresponded to the earliest  
121 time from test positivity to initiation of treatment for infused patients.

## 122 **Study Outcomes**

123 The primary outcome was hospitalization or all-cause mortality within 28 days of  
124 meeting study eligibility (day of infusion for the group receiving mAb, 30 days after test  
125 positivity for the non-infused group). We assessed in-hospital mortality using the discharge  
126 disposition of “Ceased to Breathe” sourced from the inpatient EMR and out-of-hospital deaths

127 from the Social Security Death Index. The secondary outcome was hospitalization or 28-day  
128 Emergency Department (ED) visit without hospitalization. To understand the contribution of  
129 individual elements of the primary and secondary composite outcomes, we also analyzed the  
130 frequency of individual events: ED visit without hospitalization, hospitalization, and mortality  
131 within 28 days.

## 132 **Statistical Methods**

133 After identifying patients in the study population receiving mAb, we selected from the at-  
134 risk comparator population individuals matched by propensity score.<sup>10, 11</sup> Age is a strong  
135 predictor for complications of COVID-19 and the prevalence of high-risk medical conditions  
136 vary substantially by patient age.<sup>12, 13</sup> We anticipated that differences in patient profiles between  
137 infused and non-infused patients would vary by age because of the age-specific criteria for  
138 bamlanivimab contained in the EUA. Moreover, immunosenescence occurs with aging, so we  
139 anticipated age to be a potential effect modifier in the relationship between mAb receipt and  
140 study outcomes.<sup>14</sup> Therefore, we planned *a priori* to select non-infused patients using propensity  
141 scores within age strata consistent with the EUA criteria: less than 55 years, 55 years to less than  
142 65 years, and 65 years of age and older.<sup>9</sup> Patients receiving mAb infusion and the selected  
143 comparator patients across all age strata were then combined to constitute the study population.  
144 We used this approach, rather than initially running a single model from the full dataset, to  
145 optimize selection of appropriate controls. To illustrate, in the full dataset, the prevalence of  
146 history of morbid obesity was 27.4% versus 24.9% (p=0.37) in infused vs. non-infused patients,  
147 respectively, whereas in the subset of patients age 55 to < 65 years, the respective prevalence  
148 was 66.7% vs. 22.4% (p<0.00001). Thus, we believe that more robust matching of infused to

149 non-infused patients was achieved by capturing and adjusting for the important differences in  
150 presenting profiles within each age-specific cohort.

151 Propensity scores were derived using logistic regression models fit from a multitude of  
152 variables in separate age-stratified groups with treatment with mAb as the response variable and  
153 forward stepwise selection of measured pre-treatment explanatory variables at  $p < 0.15$  (see  
154 **Supplemental Table 1** for listing of variables used in the propensity score models). We included  
155 variables deemed biologically relevant (e.g. age, gender, Charlson Comorbidity Index score) into  
156 all models prior to stepwise selection. We used 1:1 propensity score matching with a maximum  
157 propensity score probability difference of 0.01 to construct equal size matched infused and non-  
158 infused groups within age strata. We did not impute missing values for variables used in deriving  
159 the propensity scores but did assess whether patients with propensity scores (i.e., full covariate  
160 data) versus those with missing propensity scores were similar in terms of age, gender, and race  
161 distributions (to assess randomness of missing data).

162 We compared characteristics of infused versus non-infused patients using student *t*-tests  
163 for continuous variables and chi-square tests for categorical variables. Because in this  
164 observational study we must infer the time at risk for non-infused patients (starting at the time  
165 they *would have* received mAb had they been referred for care, conservatively using two days  
166 after SARS-CoV-2 testing), we compared the distribution of time from beginning of follow-up to  
167 study outcome among patients receiving mAb infusion and those who did not, both in the at-risk  
168 and matched populations (**Supplemental Table 2**). Crude 28-day rates of the study outcomes  
169 were described by infusion status. For the propensity matched patient analysis of primary and  
170 secondary outcomes, as well as individual elements of the composite outcomes (ED visit without  
171 hospitalization, hospitalization, mortality) we fit logistic regression models with the derived



172 propensity scores (i.e., predicted probability of being treated with mAb) as a continuous variable  
173 to control for confounding, with mAb receipt as the predictor of interest in the model.

174 We also performed one sensitivity and three exploratory analyses. As a sensitivity  
175 analysis, we used the propensity score (i.e., predicted probability of being treated with mAb) as a  
176 continuous variable to control for confounding and evaluate study outcomes in a larger  
177 unmatched cohort of patients who did and did not receive mAb. We did not employ the use of  
178 inverse probability weighting given the very large imbalance of eligible bamlanivimab treated  
179 versus not infused patients. We postulated that mAb may be more efficacious in the potentially  
180 immunosenescent older population. Thus, we evaluated the study outcomes within the pre-  
181 defined age strata. In the second exploratory analysis among the larger unmatched cohort, an  
182 interaction term of mAb x BMI was created to examine potential effect modification of treatment  
183 with mAb by BMI.<sup>15</sup> To identify a potential benefit of prompt (versus delayed) administration of  
184 mAb, as a third exploratory analysis we compared the rates of three outcomes – ED visit without  
185 hospitalization, hospitalization, and mortality – within the analysis group stratified by time from  
186 diagnosis to infusion: 0 to 2 days, 3 to 4 days, 5 to 7 days, and 8 to 10 days.

187 Study outcomes are described with effect estimate (odds ratio [OR]) and 95% confidence  
188 interval (95%CI). We set the alpha error at 0.05 for univariate comparisons of baseline  
189 characteristics by infusion status as well as for adjusted odds ratios. All analyses were performed  
190 using the SAS System (Cary, NC), version 9.4. Methods and results are reported in accordance  
191 with The REporting of studies Conducted using Observational Routinely-collected health Data  
192 (RECORD) statement (see **Supplemental Table 3**).<sup>16</sup>

193

## 194 **RESULTS**

## 195 **Study Population**

196           During the study period (December 9, 2020 through March 3, 2021), 636 patients  
197 received mAb. Four hundred and sixty-three (72.8%) patients achieved a study outcome or  
198 completed 28-day follow-up time and are in the analysis group, with the last infused patient who  
199 did not die treated on February 3, 2021. The non-infused at-risk population included 17,599  
200 COVID-19 non-hospitalized patients potentially eligible for mAb according to modified EUA  
201 criteria, of which 16,565 (94.1%) achieved study outcome or had sufficient follow-up time.

202           **Table 1** shows a comparison of baseline characteristics of the infused versus non-infused  
203 patients both in the unmatched at-risk population and matched study population. The unmatched  
204 populations are significantly different on most characteristics with patients receiving mAb  
205 infusion demonstrating higher frequencies of these medical conditions. After propensity score  
206 matching within age strata, 234 patients receiving mAb infusion and 234 patients not receiving  
207 mAb were included in the study population. After propensity matching, all matched and selected  
208 unmatched variables did not differ statistically between patients who received versus did not  
209 receive mAb infusion.

## 210 **Primary and Secondary Outcomes**

211           Among the 234 propensity-matched patients receiving mAb infusion, 15 (6.4%) were  
212 hospitalized, 4 (1.7%) died, and 16 (6.8%) had an ED visit without hospitalization (**Table 2**).  
213 Among the 234 propensity-matched patients not receiving mAb infusion, 38 (16.2%) were  
214 hospitalized, 12 (5.1%) died, and 15 (6.4%) had an ED visit without hospitalization. **Figure 1a**  
215 shows the frequency of the primary outcome (28-day hospitalization or mortality) and the  
216 secondary outcome (hospitalization or ED visit without hospitalization) among the matched  
217 patients receiving mAb versus those not receiving mAb infusion. In the propensity adjusted

218 analyses (**Table 2**), patients receiving mAb had an estimated 69% lower odds of hospitalization  
219 or mortality (OR 0.31, 95% CI 0.17-0.56) and estimated 50% lower odds of hospitalization or  
220 ED visit without hospitalization (OR 0.50, 95% CI 0.43-0.83). **Figure 1b** shows the frequency  
221 of the individual elements of the composite primary and secondary outcomes (ED visit without  
222 hospitalization, hospitalization, mortality) among the matched patients receiving mAb versus  
223 those not receiving mAb infusion, and **Table 2** lists the corresponding ORs and 95% confidence  
224 intervals.

### 225 **Sensitivity and Exploratory Analyses**

226 **Supplemental Table 4** provides risk estimates for the composite primary and secondary  
227 outcomes, and outcomes comprising the composite outcomes, in an unmatched cohort of patients  
228 receiving monoclonal antibody infusion and an at-risk population of patients not receiving  
229 monoclonal antibody infusion, adjusted for propensity to receive mAb. The 236 patients with  
230 non-missing covariate data who received mAb had an estimated 59% lower odds of  
231 hospitalization or mortality than the 16,565 patients who did not receive mAb (propensity-score  
232 adjusted OR 0.41, 95% CI 0.24-0.70). Thus, study results were consistent between the matched  
233 and unmatched group analyses.

234 **Table 2** provides adjusted ORs for the primary and secondary outcomes, plus individual  
235 outcomes comprising the composite outcomes, stratified by age. In propensity score adjusted  
236 analyses for the 28-day rate of hospitalization or mortality, there was no differential treatment  
237 effect by BMI. P-values for the interaction term of mAb x BMI were 0.55, 0.81, 0.38, and 0.84  
238 for all patients and in the age groups less than 55 years, 55 to less than 65 years, and 65 years  
239 and older, respectively. **Supplemental Figure 1** indicates among patients aged 65 years and  
240 older lower composite hospitalization or mortality event rates comparing mAb infused to non-

241 infused patients across all BMI categories. **Figure 2** indicates that among patients in the study  
242 population receiving mAb infusion, those who received their infusion within 4 days of their  
243 positive SARS-CoV-2 test result had lower 28-day rates of ED visit without hospitalization and  
244 hospitalization than patients who received their infusion 5 days or more after their positive  
245 SARS-CoV-2 test result. Rates of mortality were low and similar by timing of infusion.

246 Finally, age, gender, and race distributions between patients with full covariate data and  
247 those with missing data were similar (data not shown).

248

## 249 **DISCUSSION**

250 Our observational study suggests a benefit of mAb treatment in reducing the risk of  
251 COVID-19 complications for patients at higher risk of severe disease. Initial reports of  
252 bamlanivimab 700 mg in outpatients showed improvement of symptoms at day 11 for the entire  
253 study population<sup>3</sup> and numerically fewer hospitalizations and ED visits at day 29 (1.6% vs  
254 6.3%).<sup>17</sup> A post hoc analysis in BLAZE-1 of those 65 or older or with BMI of 35 kg/m<sup>2</sup> or  
255 greater demonstrated a larger numerical benefit, 2.7% vs 13.5%.<sup>3</sup> In this report of our  
256 experience, we identified a similar association between bamlanivimab monotherapy and  
257 hospitalization or mortality in a propensity matched analysis with an OR of 0.31, or a 69%  
258 lower odds of hospitalization or mortality.

259 In our health system, rates of hospitalizations and ED visits in patients aged 65 years or  
260 older were higher than the clinical trial, yet a benefit to mAb treatment was nonetheless  
261 observed. This benefit occurred through decreased hospitalizations and mortality (OR 0.28) as  
262 well as for hospitalizations alone (OR 0.32) and for hospitalizations or ED visits without

263 hospitalization (OR 0.43). We also identified a tendency of mortality benefit in this age group  
264 (OR 0.35), although our sample size and event limit declaring an association.

265 Cumulatively our report shows benefit for patients across several possible outcomes, and  
266 we consider this highly relevant from a clinical standpoint. While we did not observe statistically  
267 significant differences in the primary or secondary outcomes in younger age groups, the odds  
268 ratios in the group aged 55 to less than 65 years, and few outcomes in those age less than 55  
269 years suggest an effect may exist though potentially smaller in magnitude.

270 We identified greater benefits with administration within 4 days of symptom onset,  
271 particularly regarding rates of hospitalization. While the EUA allows for use within 10 days of  
272 symptom onset, the median duration of symptoms prior to receiving bamlanivimab 700 mg was  
273 5 days in BLAZE-1<sup>3</sup>. As with other passive antibody therapies, this is consistent with the  
274 supposition that earlier treatment is better, and health systems may reasonably evaluate a shorter  
275 window of eligibility for mAb therapy. Our analysis shows that benefits in the elderly are  
276 independent of BMI. The potential differential benefit of mAb therapy for COVID-19 in patients  
277 with this and other co-morbidities warrants more focused analysis.

278 There are several limitations of our study. Given our design, it is not surprising that there  
279 were several baseline differences between those infused and not infused in other age groups. We  
280 mitigated confounding with propensity score modeling of closely matched groups of patients,  
281 and a sensitivity analysis using propensity-score adjusted unmatched patients not receiving mAb  
282 infusion affirmed the findings. Furthermore, the group receiving mAb had more comorbid  
283 conditions predisposing to the primary and secondary outcomes, which may underestimate the  
284 magnitude of the treatment effect if there was residual confounding. We cannot reliably  
285 distinguish the presence, extent, or severity of symptoms in our data set, all of which may impact

286 effectiveness. Additionally, viral loads in blood or any site were not measured in our data set,  
287 limiting any insights based on this variable. The time to event in both treated and untreated  
288 groups were similar, suggesting that ED visit or hospitalization did not account for why the  
289 untreated population did not receive mAb. Viral loads in blood or any site were not measured in  
290 our data set, limiting any insights based on this variable.

291 We did not have information regarding variant strains of SARS-CoV-2 prior to or after  
292 bamlanivimab monotherapy. While reported rates of clinically concerning variants were low in  
293 Pennsylvania during much of this time frame, there is concern that use of bamlanivimab  
294 monotherapy will lead to escape variants and/or that variants are underreported.<sup>18</sup> We were  
295 unable to evaluate any such existing prevalence or emergence in our patients. Finally, during the  
296 time of this study, we utilized bamlanivimab monotherapy exclusively, so we are unable to  
297 comment on any comparison to the other available monoclonal antibodies for treatment of mild-  
298 moderate COVID-19 infection. On March 24<sup>th</sup>, the United States Department of Health and  
299 Human Services announced they would no longer supply sites with bamlanivimab alone due to  
300 concern about increased rates of resistant variants.<sup>19</sup> Many of our patients received bamlanivimab  
301 when the rates of resistant variants in this country was low, thus explaining why we still saw  
302 benefit with bamlanivimab monotherapy. Going forward it will be critical to better define the  
303 roles of the various available therapies and where each may be best utilized, including possibly a  
304 continued role for bamlanivimab monotherapy.

305 In our non-experimental design, we observed that bamlanivimab monotherapy is  
306 associated with decreased hospitalization rates and mortality in patients with mild-moderate  
307 COVID-19 infection, particularly among those 65 years or older, and may likely extend to  
308 younger patients as well. This benefit appears more likely when administered early after

309 diagnosis. Further study can confirm our observations and investigate the role of mAb treatment  
310 in other high-risk subgroups and the use of various mAb regimens.

311 **Acknowledgements:** The authors thank the clinical staff of the UPMC monoclonal antibody  
312 infusion centers as well as the support and administrative staff behind this effort, including but  
313 not limited to: Debbie Albin, Jennifer Dueweke, Robert Shulik, Amy Lukanski, Rozalyn Russell,  
314 Debra Rogers, Jesse Duff, Kevin Pruznak, Jennifer Zabala, Trudy Bloomquist, Daniel Gessel,  
315 LuAnn King, Jonya Brooks, Libby Shumaker, Betsy Tedesco, Sarah Sakaluk, Kathleen Flinn,  
316 Susan Spencer, Le Ann Kaltenbaugh, Michelle Adam, Meredith Axe, Melanie Pierce, Debra  
317 Masser, Theresa Murillo, Sherry Casali, Jim Krosse, Jeana Colella, Rebecca Medva, Jessica  
318 Fesz, Ashley Beyerl, Jodi Ayers, Hilary Maskiewicz, Mikaela Bortot, Amy Helmuth, Heather  
319 Schaeffer, Janice Dunsavage, Erik Hernandez, Ken Trimmer, Sheila Kruman, Teressa Polcha,  
320 and their entire teams. We also thank the U.S. federal government and Pennsylvania Department  
321 of Health for the provision of monoclonal antibody treatment.

322 **Funding Statement:** This work received no external funding.

323 **Conflict of Interest Disclosure:** None of the authors received any payments or influence from a  
324 third-party source for the work presented, and none report any potential conflicts of interest.

325



326 **References**

- 327 1. Jones BE, Brown-Augsburger PL, Corbett KS, et al. LY-CoV555, a rapidly isolated  
328 potent neutralizing antibody, provides protection in a non-human primate model of SARS-CoV-2  
329 infection. *bioRxiv*. Oct 1 2020;doi:10.1101/2020.09.30.318972
- 330 2. Myron S. Cohen<sup>1</sup>, Ajay Nirula<sup>2</sup>, Mark Mulligan<sup>3</sup>, Richard Novak<sup>4</sup>, Mary Marovich<sup>5</sup>,  
331 Alexander Stemer<sup>6</sup>, Andrew C. Adams<sup>2</sup>, Andrew E. Schade<sup>2</sup>, Jack Knorr<sup>2</sup>, Jay L. Tuttle<sup>2</sup>,  
332 Janelle Sabo<sup>2</sup>, Paul Klekotka<sup>2</sup>, Lei Shen<sup>2</sup>, Daniel M. Skovronsky<sup>2</sup>, for BLAZE-2 study team  
333 (Lilly/NIAID/CoVPN). Bamlanivimab prevents COVID-19 morbidity and mortality in nursing-  
334 home setting. Oral abstract #121. Presented at Virtual CROI 2021. .
- 335 3. Gottlieb RL, Nirula A, Chen P, et al. Effect of Bamlanivimab as Monotherapy or in  
336 Combination With Etesevimab on Viral Load in Patients With Mild to Moderate COVID-19: A  
337 Randomized Clinical Trial. *Jama*. Feb 16 2021;325(7):632-644. doi:10.1001/jama.2021.0202
- 338 4. Weinreich DM, Sivapalasingam S, Norton T, et al. REGN-COV2, a Neutralizing  
339 Antibody Cocktail, in Outpatients with Covid-19. *N Engl J Med*. Dec 17  
340 2020;doi:10.1056/NEJMoa2035002
- 341 5. Webb BJ, Buckel W, Vento T, et al. Real-World Effectiveness and Tolerability of  
342 Monoclonal Antibodies for Ambulatory Patients with Early COVID-19. 3/17/2021  
343 2021;doi:<https://doi.org/10.1101/2021.03.15.21253646>
- 344 6. Ault A. Rollout of COVID Monoclonal Antibodies Lacked Unified Plan: Expert Panel.  
345 Accessed 23 Mar 2021. Available at: <https://www.medscape.com/viewarticle/945223>.
- 346 7. Bariola JR, McCreary EK, Khadem T, Snyder GM, Wadas RJ, Nace DA, White DB,  
347 Yealy DM, Schmidhofer M. Establishing a Distribution Network for COVID-19 Monoclonal

- 348 Antibody Therapy Across a Large Health System During a Global Pandemic. *Open Forum Infect*  
349 *Dis.* 2021. In press.
- 350 8. Reitz KM, Marroquin OC, Zenati MS, et al. Association Between Preoperative  
351 Metformin Exposure and Postoperative Outcomes in Adults With Type 2 Diabetes. *JAMA Surg.*  
352 Jun 1 2020;155(6):e200416. doi:10.1001/jamasurg.2020.0416
- 353 9. FDA News Release. Coronavirus (COVID-19) update: FDA authorizes monoclonal  
354 antibody for treatment of COVID-19. Published November 9, 2020. Accessed November 13,  
355 2020. <https://bit.ly/2HesBBs>.
- 356 10. Austin PC. An Introduction to Propensity Score Methods for Reducing the Effects of  
357 Confounding in Observational Studies. *Multivariate Behav Res.* May 2011;46(3):399-424.  
358 doi:10.1080/00273171.2011.568786
- 359 11. Rosenbaum PR, Rubin DB. The central role of the propensity score in observational  
360 studies for causal effects. *Biometrika.* 1983; 70: 41-55. <https://doi.org/10.1093/biomet/70.1.41>.
- 361 12. Lim ZJ, Subramaniam A, Ponnappa Reddy M, et al. Case Fatality Rates for Patients with  
362 COVID-19 Requiring Invasive Mechanical Ventilation. A Meta-analysis. *Am J Respir Crit Care*  
363 *Med.* Jan 1 2021;203(1):54-66. doi:10.1164/rccm.202006-2405OC
- 364 13. Richardson S, Hirsch JS, Narasimhan M, et al. Presenting Characteristics, Comorbidities,  
365 and Outcomes Among 5700 Patients Hospitalized With COVID-19 in the New York City Area.  
366 *JAMA.* May 26 2020;323(20):2052-2059. doi:10.1001/jama.2020.6775
- 367 14. Bajaj V, Gadi N, Spihlman AP, Wu SC, Choi CH, Moulton VR. Aging, Immunity, and  
368 COVID-19: How Age Influences the Host Immune Response to Coronavirus Infections? *Front*  
369 *Physiol.* 2020;11:571416. doi:10.3389/fphys.2020.571416

- 370 15. Tartof SY, Qian L, Hong V, et al. Obesity and Mortality Among Patients Diagnosed With  
371 COVID-19: Results From an Integrated Health Care Organization. *Ann Intern Med.* Nov 17  
372 2020;173(10):773-781. doi:10.7326/m20-3742
- 373 16. Benchimol EI, Smeeth L, Guttman A, et al. The REporting of studies Conducted using  
374 Observational Routinely-collected health Data (RECORD) statement. *PLoS Med.* Oct  
375 2015;12(10):e1001885. doi:10.1371/journal.pmed.1001885
- 376 17. Chen P, Nirula A, Heller B, et al. SARS-CoV-2 Neutralizing Antibody LY-CoV555 in  
377 Outpatients with Covid-19. *N Engl J Med.* Jan 21 2021;384(3):229-237.  
378 doi:10.1056/NEJMoa2029849
- 379 18. Liu H, Wei P, Zhang Q, et al. 501Y.V2 and 501Y.V3 variants of SARS-CoV-2 lose  
380 binding to Bamlanivimab in vitro. *bioRxiv.* Feb 16 2021;doi:10.1101/2021.02.16.431305
- 381 19. US Department of Health and Human Services. Update on COVID-19 variants and  
382 impact on bamlanivimab distribution. Available from:  
383 [https://www.phe.gov/emergency/events/COVID19/investigation-](https://www.phe.gov/emergency/events/COVID19/investigation-MCM/Bamlanivimab/Pages/default.aspx)  
384 [MCM/Bamlanivimab/Pages/default.aspx](https://www.phe.gov/emergency/events/COVID19/investigation-MCM/Bamlanivimab/Pages/default.aspx). Accessed March 24th, 2021.  
385

387 Table 1. Comparison of Characteristics of Unmatched and Propensity Matched Patients

| Characteristic                             | Age Group Matching* | Unmatched       |                       |         | Propensity Matched |                     |         |
|--------------------------------------------|---------------------|-----------------|-----------------------|---------|--------------------|---------------------|---------|
|                                            |                     | Infused (N=463) | Not infused (N=16565) | p-value | Infused (N=234)    | Not infused (N=234) | p-value |
| Age, mean, SD                              | A,B,C               | 66.3, 14.4      | 55.3, 19.2            | <.0001  | 67.2, 13.0         | 66.1, 15.0          | 0.4079  |
| Female gender, %                           | A,B,C               | 53.3            | 59.6                  | 0.0065  | 53.4               | 50.9                | 0.5788  |
| Black race, %                              | B,C                 | 5.7             | 9.3                   | 0.0099  | 5.1                | 8.5                 | 0.1429  |
| Charlson Comorbidity Index Score, mean, SD | A,B,C               | 1.7, 1.8        | 0.9, 1.3              | <.0001  | 1.6, 1.7           | 1.5, 1.7            | 0.5540  |
| Allegheny as county of residence, %        | A,B,C               | 49.7            | 34.8                  | <.0001  | 51.3               | 46.6                | 0.3091  |
| History of cirrhosis, %                    | B                   | 3.0             | 0.9                   | <.0001  | 3.0                | 1.3                 | 0.2010  |
| History of adrenal insufficiency, %        | A                   | 7.6             | 3.6                   | 0.0012  | 7.7                | 5.1                 | 0.2575  |
| History of end stage renal disease, %      | A,B,C               | 3.0             | 0.9                   | 0.0008  | 3.0                | 3.8                 | 0.6109  |
| History of morbid obesity, %               | A,B,C               | 27.4            | 24.9                  | 0.3701  | 26.9               | 22.2                | 0.2376  |
| History of hypertension, %                 | C                   | 68.2            | 49.8                  | <.0001  | 73.5               | 75.2                | 0.6720  |
| DOACS, %                                   | B                   | 11.8            | 5.6                   | <.0001  | 11.1               | 14.1                | 0.3296  |
| Hydroxychloroquine, %                      | B                   | 3.8             | 1.5                   | 0.0051  | 3.8                | 3.0                 | 0.6109  |
| Immunomodulators, %                        | B                   | 3.8             | 1.5                   | 0.0043  | 3.4                | 2.1                 | 0.3988  |
| Statins, %                                 | B                   | 59.1            | 36.9                  | <.0001  | 58.5               | 61.1                | 0.5716  |
| Current tobacco use, %                     | Not matched         | 7.2             | 9.0                   | 0.3302  | 6.8                | 4.3                 | 0.2303  |
| Alcohol use, %                             | Not matched         | 53.8            | 51.7                  | 0.5193  | 54.1               | 46.5                | 0.1025  |
| Illicit drug use, %                        | Not matched         | 1.5             | 2.8                   | 0.0952  | 2.6                | 2.6                 | 1.0000  |
| History of diabetes, %                     | Not matched         | 30.3            | 22.1                  | <.0001  | 32.9               | 31.6                | 0.7667  |
| History of hyperlipidemia, %               | Not matched         | 75.5            | 51.2                  | <.0001  | 75.6               | 71.4                | 0.2949  |
| History of atrial fibrillation, %          | Not matched         | 15.0            | 6.0                   | <.0001  | 14.5               | 12.8                | 0.5905  |
| History of coronary artery disease, %      | Not matched         | 19.5            | 11.8                  | <.0001  | 19.7               | 26.1                | 0.0987  |
| History of congestive heart failure, %     | Not matched         | 13.5            | 6.5                   | <.0001  | 14.5               | 15.8                | 0.6991  |
| History of COPD, %                         | Not matched         | 24.9            | 17.4                  | <.0001  | 25.6               | 22.2                | 0.3861  |
| History of obstructive sleep apnea, %      | Not matched         | 30.5            | 18.7                  | <.0001  | 30.3               | 29.9                | 0.9197  |

|                                      |             |      |      |        |      |      |        |
|--------------------------------------|-------------|------|------|--------|------|------|--------|
| History of pulmonary hypertension, % | Not matched | 4.9  | 1.7  | <.0001 | 6.4  | 5.1  | 0.5520 |
| ACE Inhibitors, %                    | Not matched | 21.9 | 18.0 | 0.1133 | 21.4 | 20.1 | 0.7323 |
| Antidepressants, %                   | Not matched | 32.5 | 32.6 | 0.9794 | 32.5 | 35.0 | 0.5575 |
| Beta blockers, %                     | Not matched | 38.0 | 23.9 | <.0001 | 37.2 | 41.9 | 0.2983 |
| Corticosteroids, %                   | Not matched | 38.4 | 45.4 | 0.0052 | 36.8 | 40.2 | 0.4472 |

388

\*A: Age < 55 years; B: Age 55 to < 65 years; C: Age 65 years and older.

**Table 2. Propensity Matched Event Rates and Odds Ratios of Study Outcomes Overall and Stratified by Age Group**

| Outcome                                             | Number of Events   |                        | 28-Day Event Rate (%) |             | Odds Ratio Estimates |            |         |
|-----------------------------------------------------|--------------------|------------------------|-----------------------|-------------|----------------------|------------|---------|
|                                                     | Infused<br>(n=234) | Not Infused<br>(n=234) | Infused               | Not Infused | Odds Ratio           | 95% CI     | p-value |
| <b>All Patients</b>                                 |                    |                        |                       |             |                      |            |         |
| Hospitalization or mortality                        | 16                 | 45                     | 6.8                   | 19.2        | 0.31                 | 0.17, 0.56 | 0.00001 |
| Hospitalization or ED visit without hospitalization | 28                 | 50                     | 12.0                  | 21.4        | 0.50                 | 0.43, 0.83 | 0.007   |
| ED visit without hospitalization                    | 16                 | 15                     | 6.4                   | 6.4         | 1.07                 | 0.52, 2.22 | 0.85    |
| Hospitalization                                     | 15                 | 38                     | 6.4                   | 16.2        | 0.35                 | 0.19, 0.66 | 0.001   |
| Mortality                                           | 4                  | 12                     | 1.7                   | 5.1         | 0.32                 | 0.10, 1.01 | 0.05    |
| <b>Age &lt; 55 years</b>                            | <b>(n=42)</b>      | <b>(n=42)</b>          |                       |             |                      |            |         |
| Hospitalization or mortality                        | 2                  | 3                      | 4.8                   | 7.1         | 0.65                 | 0.10, 4.10 | 0.65    |
| Hospitalization or ED visit without hospitalization | 7                  | 5                      | 16.7                  | 11.9        | 1.48                 | 0.43, 5.10 | 0.53    |
| ED visit without hospitalization                    | 6                  | 4                      | 14.3                  | 9.5         | 1.58                 | 0.41, 6.08 | 0.50    |
| Hospitalization                                     | 2                  | 3                      | 4.8                   | 7.1         | 0.65                 | 0.10, 4.10 | 0.65    |
| Mortality                                           | 0                  | 0                      | 0.0                   | 0.0         | -----                | -----      | -----   |
| <b>Age 55 to &lt; 65 years</b>                      | <b>(n=34)</b>      | <b>(n=34)</b>          |                       |             |                      |            |         |
| Hospitalization or mortality                        | 2                  | 6                      | 5.9                   | 17.6        | 0.29                 | 0.05, 1.56 | 0.15    |
| Hospitalization or ED visit without hospitalization | 2                  | 7                      | 5.9                   | 20.6        | 0.24                 | 0.05, 1.26 | 0.09    |
| ED visit without hospitalization                    | 1                  | 2                      | 2.9                   | 5.9         | 0.49                 | 0.04, 5.61 | 0.56    |
| Hospitalization                                     | 2                  | 5                      | 5.9                   | 14.7        | 0.36                 | 0.06, 2.01 | 0.25    |
| Mortality                                           | 0                  | 1                      | 0.0                   | 2.9         | 0.0                  | -----      | -----   |
| <b>Age 65 years and older</b>                       | <b>(n=158)</b>     | <b>(n=158)</b>         |                       |             |                      |            |         |
| Hospitalization or mortality                        | 12                 | 36                     | 7.6                   | 22.8        | 0.28                 | 0.14, 0.56 | 0.0003  |
| Hospitalization or ED visit without hospitalization | 19                 | 38                     | 12.0                  | 24.0        | 0.43                 | 0.24, 0.79 | 0.006   |
| ED visit without hospitalization                    | 9                  | 9                      | 5.7                   | 5.7         | 1.00                 | 0.39, 2.59 | 1.0     |
| Hospitalization                                     | 11                 | 30                     | 7.0                   | 19.0        | 0.32                 | 0.15, 0.66 | 0.002   |
| Mortality                                           | 4                  | 11                     | 2.5                   | 7.0         | 0.35                 | 0.11, 1.11 | 0.08    |

391 **FIGURE LEGENDS**

392

393 **Figure 1a.** Frequency of 28-day hospitalization or mortality (primary outcome), and  
394 hospitalization or Emergency Department visit without hospitalization (secondary outcome)  
395 among the matched patients receiving monoclonal antibody (orange bars) versus those not  
396 receiving monoclonal antibody infusion (blue bars). P-values are from the logistic regression  
397 models.

398

399 **Figure 1b.** Frequency of the individual elements of the composite primary and secondary  
400 outcomes including Emergency Department visit without hospitalization, hospitalization, and  
401 mortality among the matched patients receiving monoclonal antibody (orange bars) versus those  
402 not receiving monoclonal antibody infusion (blue bars). P-values are from the logistic regression  
403 models.

404

405 **Figure 2.** Among all study patients receiving monoclonal antibody infusion, comparison of  
406 crude 28-day outcome rates by timing of infusion. Blue bars (0 to 2 days), orange bars (3 to 4  
407 days), grey bars (5 to 7 days), yellow bars (8 days or more).

408

409 **FIGURES**

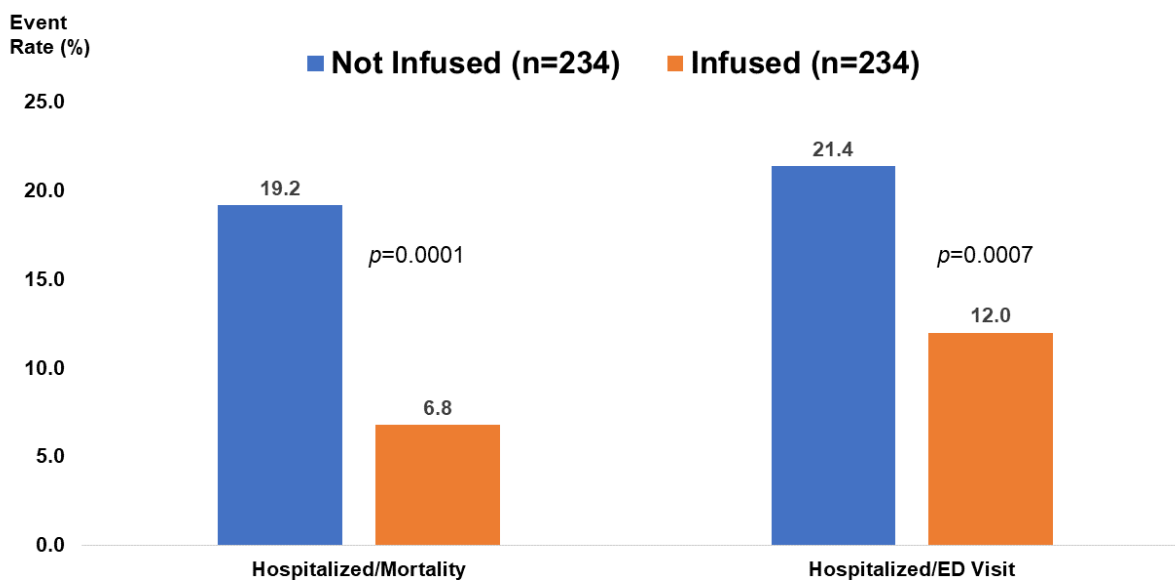

Figure 1a.

410

411

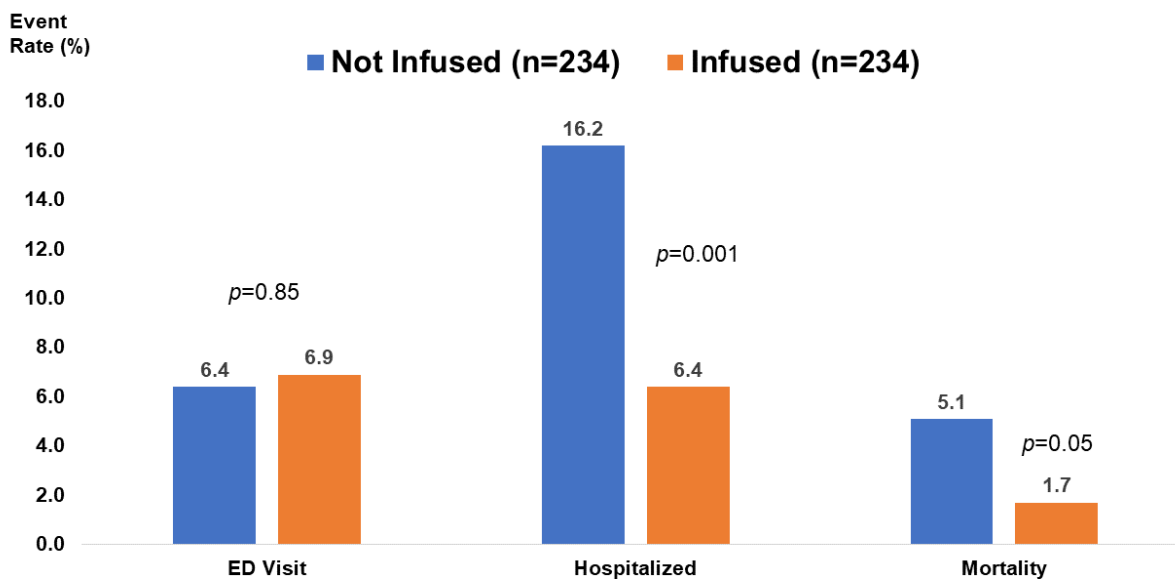

Figure 1b.

412



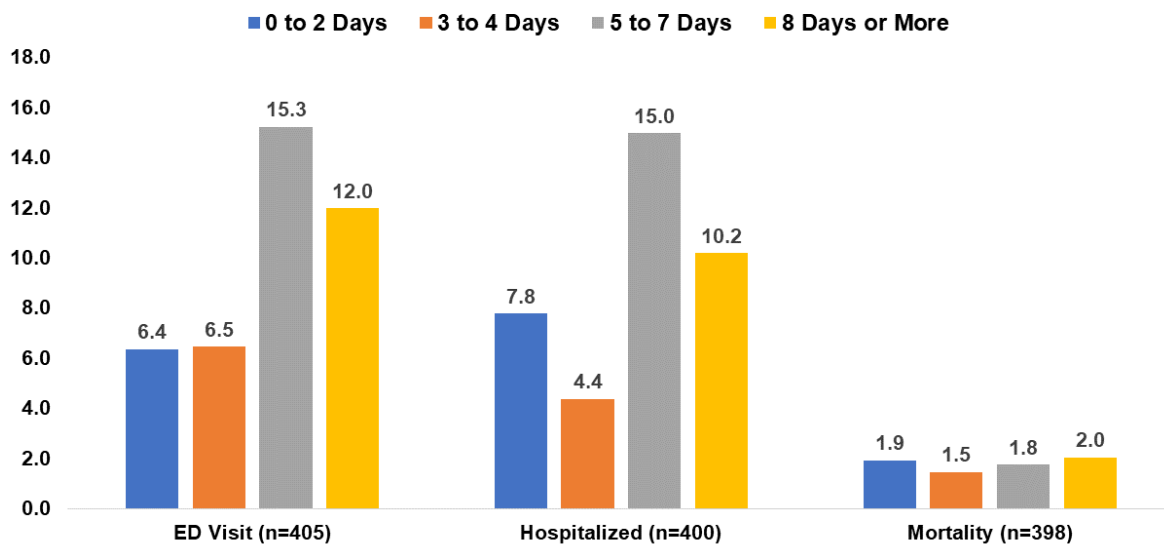

Figure 2.

413

414 **SUPPLEMENTAL MATERIALS**

415

416 **Supplemental Table 1.** Variables selected for propensity score adjustment

| Analysis Group       | Variables                                                                                                                                                                                                                                                                                        |
|----------------------|--------------------------------------------------------------------------------------------------------------------------------------------------------------------------------------------------------------------------------------------------------------------------------------------------|
| Age < 55 years       | Age<br>Gender<br>Residence in Allegheny county<br>Morbid obesity<br>History of renal insufficiency<br>History of end stage renal disease<br>History of irritable bowel syndrome<br>Charlson Comorbidity Index score<br>Model c-statistic: 0.826                                                  |
| Age 55 to < 65 years | Age<br>Gender<br>Race<br>Residence in Allegheny county<br>Morbid obesity<br>History of cirrhosis<br>History of end stage renal disease<br>Charlson Comorbidity Index score<br>Medications: direct oral anticoagulants, hydroxychloroquine, immunomodulators, statins<br>Model c-statistic: 0.852 |
| Age ≥ 65 years       | Age<br>Gender<br>Race<br>Residence in Allegheny county<br>Morbid obesity<br>History of hypertension<br>Charlson Comorbidity Index score<br>Model c-statistic: 0.670                                                                                                                              |

417

418 **Supplemental Table 2.** Comparison of days to individual outcomes between patients receiving  
 419 monoclonal antibody infusion and patients not receiving monoclonal antibody infusion, in both  
 420 the at-risk population and matched study population.

|                          | Outcome                          | Infused |        |         | Not Infused |        |       | p-value |
|--------------------------|----------------------------------|---------|--------|---------|-------------|--------|-------|---------|
|                          |                                  | N       | Median | IQR     | N           | Median | IQR   |         |
| At-risk population       | ED visit without hospitalization | 30      | 7      | 4, 15   | 1040        | 4      | 2, 10 | 0.04    |
|                          | Hospitalization                  | 31      | 8      | 2, 15   | 1379        | 5      | 2, 11 | 0.40    |
|                          | Mortality                        | 7       | 13     | 5, 23   | 301         | 11     | 7, 16 | 0.38    |
| Matched study population | ED visit without hospitalization | 16      | 7      | 2.5, 14 | 15          | 4      | 2, 8  | 0.20    |
|                          | Hospitalization                  | 15      | 5      | 1, 21   | 38          | 8.5    | 3, 16 | 0.66    |
|                          | Mortality                        | 4       | 18     | 8.5, 24 | 12          | 9.5    | 9, 11 | 0.16    |

421 Note: ED, Emergency Department; IQR, interquartile range

422 **Supplemental Table 3.** RECORD statement

|                           | Item No. | STROBE items                                                                                                                                                                               | Location in manuscript where items are reported                                                                  | RECORD items                                                                                                                                                                                                                                                                                                                                                                                                                                | Location in manuscript where items are reported |
|---------------------------|----------|--------------------------------------------------------------------------------------------------------------------------------------------------------------------------------------------|------------------------------------------------------------------------------------------------------------------|---------------------------------------------------------------------------------------------------------------------------------------------------------------------------------------------------------------------------------------------------------------------------------------------------------------------------------------------------------------------------------------------------------------------------------------------|-------------------------------------------------|
| <b>Title and abstract</b> |          |                                                                                                                                                                                            |                                                                                                                  |                                                                                                                                                                                                                                                                                                                                                                                                                                             |                                                 |
|                           | 1        | (a) Indicate the study's design with a commonly used term in the title or the abstract (b) Provide in the abstract an informative and balanced summary of what was done and what was found | Page 3; Lines 41-46                                                                                              | RECORD 1.1: The type of data used should be specified in the title or abstract. When possible, the name of the databases used should be included.<br><br>RECORD 1.2: If applicable, the geographic region and timeframe within which the study took place should be reported in the title or abstract.<br><br>RECORD 1.3: If linkage between databases was conducted for the study, this should be clearly stated in the title or abstract. | Page 3; Lines 41-46                             |
| <b>Introduction</b>       |          |                                                                                                                                                                                            |                                                                                                                  |                                                                                                                                                                                                                                                                                                                                                                                                                                             |                                                 |
| Background rationale      | 2        | Explain the scientific background and rationale for the investigation being reported                                                                                                       | Page 4; Lines 65-67, 73-77                                                                                       |                                                                                                                                                                                                                                                                                                                                                                                                                                             |                                                 |
| Objectives                | 3        | State specific objectives, including any prespecified hypotheses                                                                                                                           | Page 4; Lines 70-72 (hypothesis), Lines 73-77 (objectives)                                                       |                                                                                                                                                                                                                                                                                                                                                                                                                                             |                                                 |
| <b>Methods</b>            |          |                                                                                                                                                                                            |                                                                                                                  |                                                                                                                                                                                                                                                                                                                                                                                                                                             |                                                 |
| Study Design              | 4        | Present key elements of study design early in the paper                                                                                                                                    | Page 6; Lines 110-121                                                                                            |                                                                                                                                                                                                                                                                                                                                                                                                                                             |                                                 |
| Setting                   | 5        | Describe the setting, locations, and relevant dates, including periods of recruitment, exposure, follow-up, and data collection                                                            | Page 5; Lines 81-84 (Setting/locations)<br><br>Page 6; Lines 104-105 (relevant dates of exposure), Lines 110-112 |                                                                                                                                                                                                                                                                                                                                                                                                                                             |                                                 |

|                           |   |                                                                                                                                                                                                                                                                                                                                                                                                                                                                                                                                                                                                                                                                                                                              |                                                                                                                                                         |                                                                                                                                                                                                                                                                                                                                                                                                                                                                                                                                                                                                                                                                                                      |                                                                                                                        |
|---------------------------|---|------------------------------------------------------------------------------------------------------------------------------------------------------------------------------------------------------------------------------------------------------------------------------------------------------------------------------------------------------------------------------------------------------------------------------------------------------------------------------------------------------------------------------------------------------------------------------------------------------------------------------------------------------------------------------------------------------------------------------|---------------------------------------------------------------------------------------------------------------------------------------------------------|------------------------------------------------------------------------------------------------------------------------------------------------------------------------------------------------------------------------------------------------------------------------------------------------------------------------------------------------------------------------------------------------------------------------------------------------------------------------------------------------------------------------------------------------------------------------------------------------------------------------------------------------------------------------------------------------------|------------------------------------------------------------------------------------------------------------------------|
|                           |   |                                                                                                                                                                                                                                                                                                                                                                                                                                                                                                                                                                                                                                                                                                                              | Page 10; 196-199 (follow up)                                                                                                                            |                                                                                                                                                                                                                                                                                                                                                                                                                                                                                                                                                                                                                                                                                                      |                                                                                                                        |
| Participants              | 6 | <p>(a) <i>Cohort study</i> - Give the eligibility criteria, and the sources and methods of selection of participants. Describe methods of follow-up</p> <p><i>Case-control study</i> - Give the eligibility criteria, and the sources and methods of case ascertainment and control selection. Give the rationale for the choice of cases and controls</p> <p><i>Cross-sectional study</i> - Give the eligibility criteria, and the sources and methods of selection of participants</p> <p>(b) <i>Cohort study</i> - For matched studies, give matching criteria and number of exposed and unexposed</p> <p><i>Case-control study</i> - For matched studies, give matching criteria and the number of controls per case</p> | <p>Page 6; Lines 104-110 (eligibility), Lines 113-121 (comparator group and period of follow up)</p> <p>Page 8; Lines 151-161 (PS matching process)</p> | <p>RECORD 6.1: The methods of study population selection (such as codes or algorithms used to identify subjects) should be listed in detail. If this is not possible, an explanation should be provided.</p> <p>RECORD 6.2: Any validation studies of the codes or algorithms used to select the population should be referenced. If validation was conducted for this study and not published elsewhere, detailed methods and results should be provided.</p> <p>RECORD 6.3: If the study involved linkage of databases, consider use of a flow diagram or other graphical display to demonstrate the data linkage process, including the number of individuals with linked data at each stage.</p> | Page 5; Lines 96-102 (database)                                                                                        |
| Variables                 | 7 | Clearly define all outcomes, exposures, predictors, potential confounders, and effect modifiers. Give diagnostic criteria, if applicable.                                                                                                                                                                                                                                                                                                                                                                                                                                                                                                                                                                                    | <p>Page 6-7; Lines 123-131 (outcomes)</p> <p>Page 7-8; Lines 142-150, 151-161 (addressing confounders)</p>                                              | RECORD 7.1: A complete list of codes and algorithms used to classify exposures, outcomes, confounders, and effect modifiers should be provided. If these cannot be reported, an explanation should be provided.                                                                                                                                                                                                                                                                                                                                                                                                                                                                                      | <p>Page 6-7; Lines 123-131 (Codes for primary outcomes)</p> <p>Supplemental Table 1 (PS variables for confounding)</p> |
| Data sources/ measurement | 8 | For each variable of interest, give sources of data and details of methods of assessment (measurement). Describe comparability of assessment methods if there is more than one group                                                                                                                                                                                                                                                                                                                                                                                                                                                                                                                                         | <p>Page 5; Lines 91-102 (sources of data)</p> <p>Page 7-9; Lines 133-134, 140-192 (method of assessment and data analysis)</p>                          |                                                                                                                                                                                                                                                                                                                                                                                                                                                                                                                                                                                                                                                                                                      |                                                                                                                        |

|                                  |    |                                                                                                                                                                                                                                                                                                                                                                                                                                                                                                                                                                      |                         |                                                                                                                                                                                                                                                              |                      |
|----------------------------------|----|----------------------------------------------------------------------------------------------------------------------------------------------------------------------------------------------------------------------------------------------------------------------------------------------------------------------------------------------------------------------------------------------------------------------------------------------------------------------------------------------------------------------------------------------------------------------|-------------------------|--------------------------------------------------------------------------------------------------------------------------------------------------------------------------------------------------------------------------------------------------------------|----------------------|
| Bias                             | 9  | Describe any efforts to address potential sources of bias                                                                                                                                                                                                                                                                                                                                                                                                                                                                                                            | Page 7-9; Lines 132-192 |                                                                                                                                                                                                                                                              |                      |
| Study size                       | 10 | Explain how the study size was arrived at                                                                                                                                                                                                                                                                                                                                                                                                                                                                                                                            | Page 10; Lines 196-209  |                                                                                                                                                                                                                                                              |                      |
| Quantitative variables           | 11 | Explain how quantitative variables were handled in the analyses. If applicable, describe which groupings were chosen, and why                                                                                                                                                                                                                                                                                                                                                                                                                                        | Page 8; Lines 162-163   |                                                                                                                                                                                                                                                              |                      |
| Statistical methods              | 12 | (a) Describe all statistical methods, including those used to control for confounding<br>(b) Describe any methods used to examine subgroups and interactions<br>(c) Explain how missing data were addressed<br>(d) <i>Cohort study</i> - If applicable, explain how loss to follow-up was addressed<br><i>Case-control study</i> - If applicable, explain how matching of cases and controls was addressed<br><i>Cross-sectional study</i> - If applicable, describe analytical methods taking account of sampling strategy<br>(e) Describe any sensitivity analyses | Page 7-9; Lines 132-192 |                                                                                                                                                                                                                                                              |                      |
| Data access and cleaning methods |    | ..                                                                                                                                                                                                                                                                                                                                                                                                                                                                                                                                                                   |                         | RECORD 12.1: Authors should describe the extent to which the investigators had access to the database population used to create the study population.<br><br>RECORD 12.2: Authors should provide information on the data cleaning methods used in the study. | Page 5; Lines 91-102 |
| Linkage                          |    | ..                                                                                                                                                                                                                                                                                                                                                                                                                                                                                                                                                                   |                         | RECORD 12.3: State whether the study included person-level, institutional-level, or other data linkage across two or more databases. The methods of linkage and                                                                                              | Page 5; Lines 91-102 |

|                  |    |                                                                                                                                                                                                                                                                                                                                                 |                                                                                                                                                                                                                              |                                                                                                                                                                                                                                                                                                                    |                        |
|------------------|----|-------------------------------------------------------------------------------------------------------------------------------------------------------------------------------------------------------------------------------------------------------------------------------------------------------------------------------------------------|------------------------------------------------------------------------------------------------------------------------------------------------------------------------------------------------------------------------------|--------------------------------------------------------------------------------------------------------------------------------------------------------------------------------------------------------------------------------------------------------------------------------------------------------------------|------------------------|
|                  |    |                                                                                                                                                                                                                                                                                                                                                 |                                                                                                                                                                                                                              | methods of linkage quality evaluation should be provided.                                                                                                                                                                                                                                                          |                        |
| <b>Results</b>   |    |                                                                                                                                                                                                                                                                                                                                                 |                                                                                                                                                                                                                              |                                                                                                                                                                                                                                                                                                                    |                        |
| Participants     | 13 | (a) Report the numbers of individuals at each stage of the study ( <i>e.g.</i> , numbers potentially eligible, examined for eligibility, confirmed eligible, included in the study, completing follow-up, and analysed)<br>(b) Give reasons for non-participation at each stage.<br>(c) Consider use of a flow diagram                          | Page 10; Lines 196-209                                                                                                                                                                                                       | RECORD 13.1: Describe in detail the selection of the persons included in the study ( <i>i.e.</i> , study population selection) including filtering based on data quality, data availability and linkage. The selection of included persons can be described in the text and/or by means of the study flow diagram. | Page 10; Lines 196-209 |
| Descriptive data | 14 | (a) Give characteristics of study participants ( <i>e.g.</i> , demographic, clinical, social) and information on exposures and potential confounders<br>(b) Indicate the number of participants with missing data for each variable of interest<br>(c) <i>Cohort study</i> - summarise follow-up time ( <i>e.g.</i> , average and total amount) | (a)<br>Page 10, Lines 202-209<br>Pages 20-21, Lines 287-288, Table 2<br>(b)<br>Page 8, Lines 158-161<br>Page 12, Lines 246-247<br>(c)<br>Page 6, Lines 110-112 and 116-121. Time to event data not analyzed by study design. |                                                                                                                                                                                                                                                                                                                    |                        |
| Outcome data     | 15 | <i>Cohort study</i> - Report numbers of outcome events or summary measures over time<br><i>Case-control study</i> - Report numbers in each exposure category, or summary measures of exposure<br><i>Cross-sectional study</i> - Report numbers of outcome events or summary measures                                                            | Page 10, Lines 213-214<br>Page 22, Lines 389-390, Table 2<br>Page 24, Lines 409-412<br>Page 27, Lines 418-412, Supplemental Table 2<br>Page 34, Lines 424-427, Supplemental Table 4                                          |                                                                                                                                                                                                                                                                                                                    |                        |

|                   |    |                                                                                                                                                                                                                                                                                                                                                                                                                 |                                                                                                                                                                                                                                                                 |                                                                                                                                                                                                                                                                                                          |                                                     |
|-------------------|----|-----------------------------------------------------------------------------------------------------------------------------------------------------------------------------------------------------------------------------------------------------------------------------------------------------------------------------------------------------------------------------------------------------------------|-----------------------------------------------------------------------------------------------------------------------------------------------------------------------------------------------------------------------------------------------------------------|----------------------------------------------------------------------------------------------------------------------------------------------------------------------------------------------------------------------------------------------------------------------------------------------------------|-----------------------------------------------------|
| Main results      | 16 | (a) Give unadjusted estimates and, if applicable, confounder-adjusted estimates and their precision (e.g., 95% confidence interval). Make clear which confounders were adjusted for and why they were included<br>(b) Report category boundaries when continuous variables were categorized<br>(c) If relevant, consider translating estimates of relative risk into absolute risk for a meaningful time period | (a)<br>Page 10, Lines 202-209 (unadjusted)<br>Pages 10-11, Lines 210-224 (adjusted)<br>Page 22, Lines 389-390, Table 2 (both)<br>(b)<br>N/A, all variables are continuous or binary. Subgroup age categories are defined. (Page 7, Lines 140-142)<br>(c)<br>N/A |                                                                                                                                                                                                                                                                                                          |                                                     |
| Other analyses    | 17 | Report other analyses done—e.g., analyses of subgroups and interactions, and sensitivity analyses                                                                                                                                                                                                                                                                                                               | Pages 11-12, Lines 225-247                                                                                                                                                                                                                                      |                                                                                                                                                                                                                                                                                                          |                                                     |
| <b>Discussion</b> |    |                                                                                                                                                                                                                                                                                                                                                                                                                 |                                                                                                                                                                                                                                                                 |                                                                                                                                                                                                                                                                                                          |                                                     |
| Key results       | 18 | Summarise key results with reference to study objectives                                                                                                                                                                                                                                                                                                                                                        | Page 12, Lines 250-258<br>Pages 14-15, Lines 305-309                                                                                                                                                                                                            |                                                                                                                                                                                                                                                                                                          |                                                     |
| Limitations       | 19 | Discuss limitations of the study, taking into account sources of potential bias or imprecision. Discuss both direction and magnitude of any potential bias                                                                                                                                                                                                                                                      | Page 13, Lines 278-290                                                                                                                                                                                                                                          | RECORD 19.1: Discuss the implications of using data that were not created or collected to answer the specific research question(s). Include discussion of misclassification bias, unmeasured confounding, missing data, and changing eligibility over time, as they pertain to the study being reported. | Page 8, Lines 151-161<br>Pages 13-14, Lines 278-290 |
| Interpretation    | 20 | Give a cautious overall interpretation of results considering objectives, limitations, multiplicity of analyses, results from similar studies, and other relevant evidence                                                                                                                                                                                                                                      | Pages 14-15, Lines 305-310                                                                                                                                                                                                                                      |                                                                                                                                                                                                                                                                                                          |                                                     |



|                                                           |    |                                                                                                                                                               |                                                |                                                                                                                                                          |                        |
|-----------------------------------------------------------|----|---------------------------------------------------------------------------------------------------------------------------------------------------------------|------------------------------------------------|----------------------------------------------------------------------------------------------------------------------------------------------------------|------------------------|
| Generalisability                                          | 21 | Discuss the generalisability (external validity) of the study results                                                                                         | Page 14, Lines 291-298                         |                                                                                                                                                          |                        |
| <b>Other Information</b>                                  |    |                                                                                                                                                               |                                                |                                                                                                                                                          |                        |
| Funding                                                   | 22 | Give the source of funding and the role of the funders for the present study and, if applicable, for the original study on which the present article is based | Page 16, Line 322 (no external funding source) |                                                                                                                                                          |                        |
| Accessibility of protocol, raw data, and programming code |    | ..                                                                                                                                                            |                                                | RECORD 22.1: Authors should provide information on how to access any supplemental information such as the study protocol, raw data, or programming code. | Not available/provided |

423 \*Checklist is protected under Creative Commons Attribution ([CC BY](https://creativecommons.org/licenses/by/4.0/)) license.

424 **Supplemental Table 4.** Composite primary and secondary outcomes, and outcomes comprising the composite outcomes, in an  
 425 unmatched cohort of patients receiving monoclonal antibody infusion and an at-risk population of patients not receiving monoclonal  
 426 antibody infusion

|                                                     | All Patients       |                              |                |                | Patients with Propensity Score |                              |                |                | Odds Ratio Estimates |            |         |
|-----------------------------------------------------|--------------------|------------------------------|----------------|----------------|--------------------------------|------------------------------|----------------|----------------|----------------------|------------|---------|
|                                                     | Number of Events   |                              | Event Rate (%) |                | Number of Events               |                              | Event Rate (%) |                | Adj. OR              | 95%CI      | P-value |
|                                                     | Infused<br>(n=463) | Not<br>Infused<br>(n=16,565) | Infused        | Not<br>Infused | Infused<br>(n=236)             | Not<br>Infused<br>(n=16,515) | Infused        | Not<br>Infused |                      |            |         |
| Hospitalization or mortality                        | 33                 | 1516                         | 7.1            | 9.1            | 17                             | 1507                         | 7.2            | 9.1            | 0.41                 | 0.24, 0.70 | 0.001   |
| Hospitalization or ED visit without hospitalization | 56                 | 2254                         | 12.1           | 13.6           | 29                             | 2244                         | 12.3           | 13.6           | 0.60                 | 0.40, 0.91 | 0.02    |
| ED visit without hospitalization                    | 30                 | 1040                         | 6.5            | 6.3            | 16                             | 1037                         | 6.8            | 6.3            | 1.05                 | 0.63, 1.77 | 0.85    |
| Hospitalization                                     | 31                 | 1379                         | 6.7            | 8.3            | 16                             | 1371                         | 6.8            | 8.3            | 0.44                 | 0.25, 0.77 | 0.004   |
| Mortality                                           | 7                  | 301                          | 1.5            | 1.8            | 5                              | 300                          | 2.1            | 1.8            | 0.37                 | 0.12, 1.16 | 0.29    |

427 Note: ED, Emergency Department; OR, odds ratio; 95%CI, 95% confidence interval

428 **Supplemental Figure 1.** Frequency of composite hospitalization or mortality outcome among  
429 study population aged 65 years and older, by treatment received and BMI category

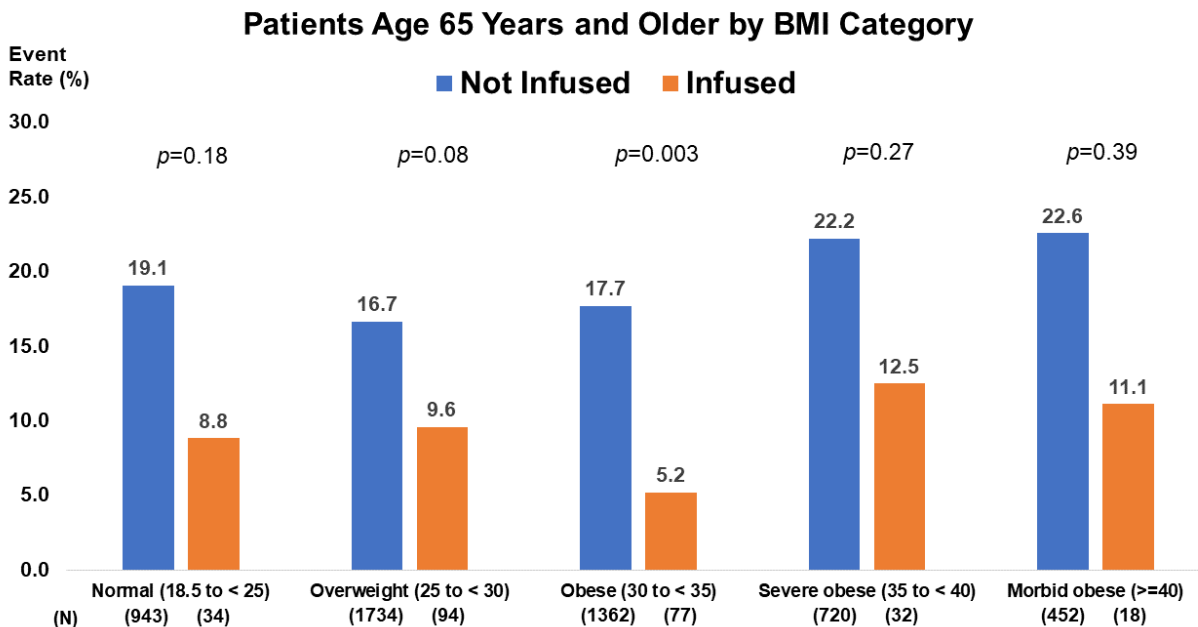

430 **Supplemental Figure 1.**

431 Note: BMI, body mass index in units of kilograms per meter squared.
